# Supplementary material for: UVC-Based Air Disinfection Systems for Rapid Inactivation of SARS-CoV-2 Present in the Air
Source: MDPI journal article supplement (doi:10.3390/pathogens12030419), 2023-03-07
Supplement: s1 [file s1]

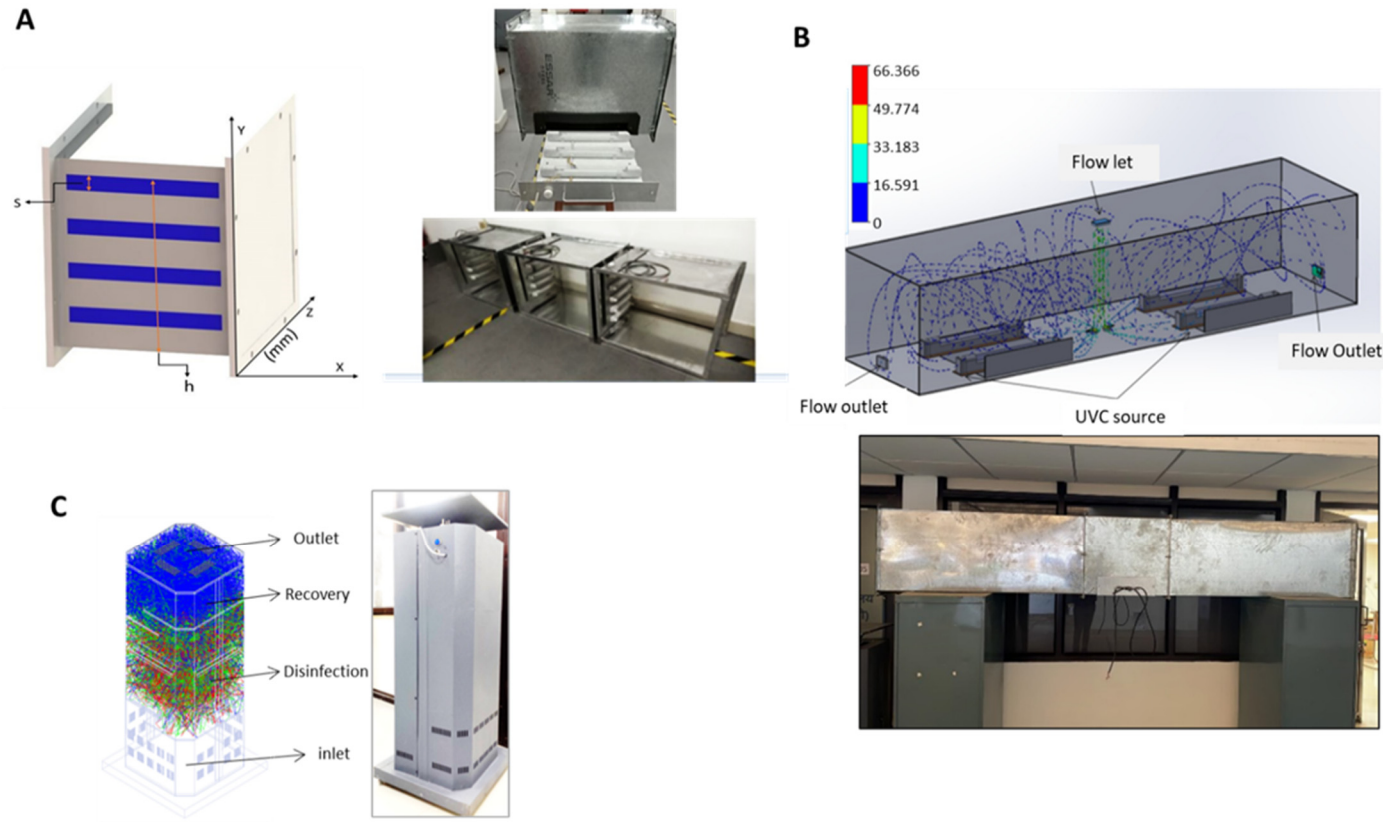

**Supplementary Figure S1: Configuration of UVC disinfection systems.** The figures are related to figure 1 and along with the CAD drawings actual photo of system is shown.
